# Supplementary material for: Treatment patterns of ranibizumab intravitreal injection and dexamethasone intravitreal implant for retinal vein occlusion in the USA
Source: PubMed Central journal article supplement — Eye (Lond). 2016 Dec 2;31(4):551–9. doi: 10.1038/eye.2016.269 (PMC5395996; doi:10.1038/eye.2016.269), 2016-12-02
Supplement: eye2016269x1.pdf [file eye2016269x1.pdf]

**Supplementary Figure 1.** Selection process and attrition of patient groups for patients who had 24 months of follow-up data. An equal interval of 30 days per month was used in all programming.

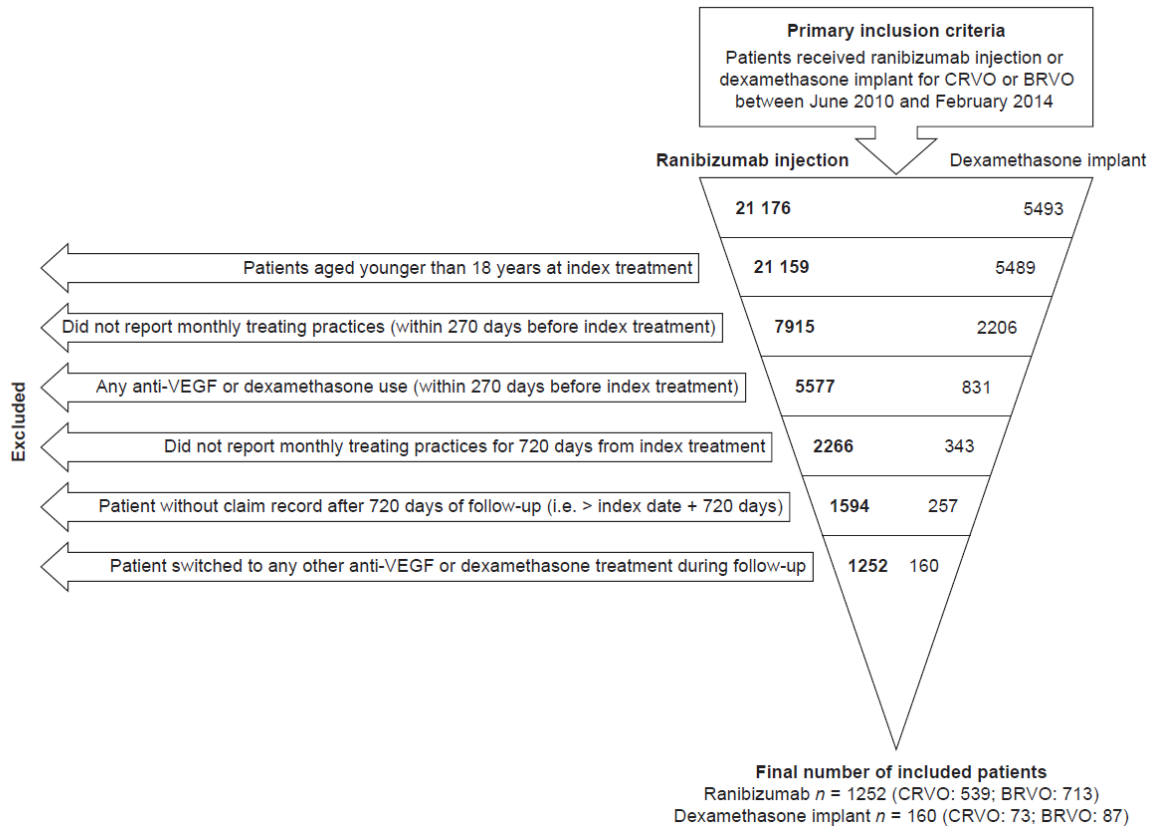

BRVO, branch retinal vein occlusion; CRVO, central retinal vein occlusion; VEGF, vascular endothelial growth factor.
