# Supplementary material for: Treatment patterns of ranibizumab intravitreal injection and dexamethasone intravitreal implant for retinal vein occlusion in the USA
Source: PubMed Central journal article supplement — Eye (Lond). 2016 Dec 2;31(4):551–9. doi: 10.1038/eye.2016.269 (PMC5395996; doi:10.1038/eye.2016.269), 2016-12-02
Supplement: eye2016269x2.pdf [file eye2016269x2.pdf]

**Supplementary Table 1.** Demographics and baseline characteristics for patients with CRVO or BRVO treated with ranibizumab injection or dexamethasone implant who had 24 months of follow-up data.

| Characteristic                             | CRVO ( <i>n</i> = 612)                     |                                           |                 | BRVO ( <i>n</i> = 800)                     |                                           |                 |
|--------------------------------------------|--------------------------------------------|-------------------------------------------|-----------------|--------------------------------------------|-------------------------------------------|-----------------|
|                                            | Ranibizumab injection<br>( <i>n</i> = 539) | Dexamethasone implant<br>( <i>n</i> = 73) | <i>P</i> -value | Ranibizumab injection<br>( <i>n</i> = 713) | Dexamethasone implant<br>( <i>n</i> = 87) | <i>P</i> -value |
| Age, mean, years, (SD)                     | 72.5 (11.7)                                | 70.1 (11.1)                               | 0.094           | 73.4 (9.8)                                 | 72.8 (10.3)                               | 0.604           |
| Female, <i>n</i> (%)                       | 296 (54.9)                                 | 37 (50.7)                                 | 0.496           | 407 (57.1)                                 | 36 (41.4)                                 | 0.005           |
| Charlson–Deyo Comorbidity Index, mean (SD) | 0.68 (1.13)                                | 0.71 (1.11)                               | 0.834           | 0.59 (1.06)                                | 0.62 (0.98)                               | 0.773           |
| Payer type, <i>n</i> (%)                   |                                            |                                           |                 |                                            |                                           |                 |
| Commercial                                 | 169 (31.4)                                 | 33 (45.2)                                 | 0.045           | 232 (32.5)                                 | 29 (33.3)                                 | 0.946           |
| Medicare                                   | 364 (67.5)                                 | 39 (53.4)                                 |                 | 476 (66.8)                                 | 58 (66.7)                                 |                 |
| Medicaid                                   | 6 (1.1)                                    | 1 (1.4)                                   |                 | 5 (0.7)                                    | 0 (0.0)                                   |                 |
| US geographical region, <i>n</i> (%)       |                                            |                                           |                 |                                            |                                           |                 |
| Midwest                                    | 77 (14.3)                                  | 8 (11.0)                                  | 0.212           | 106 (14.9)                                 | 19 (21.8)                                 | < 0.0001        |
| Northeast                                  | 161 (29.9)                                 | 29 (39.7)                                 |                 | 233 (32.7)                                 | 27 (31.0)                                 |                 |
| West                                       | 230 (42.7)                                 | 24 (32.9)                                 |                 | 301 (42.2)                                 | 19 (21.8)                                 |                 |
| South                                      | 71 (13.2)                                  | 12 (16.4)                                 |                 | 73 (10.2)                                  | 22 (25.3)                                 |                 |

BRVO, branch retinal vein occlusion; CRVO, central retinal vein occlusion; SD, standard deviation.
