# Supplementary material for: Treatment patterns of ranibizumab intravitreal injection and dexamethasone intravitreal implant for retinal vein occlusion in the USA
Source: PubMed Central journal article supplement — Eye (Lond). 2016 Dec 2;31(4):551–9. doi: 10.1038/eye.2016.269 (PMC5395996; doi:10.1038/eye.2016.269), 2016-12-02
Supplement: eye2016269x3.pdf [file eye2016269x3.pdf]

**Supplementary Table 2.** Mean number (SD) of ophthalmology visits and time intervals between visits for patients with CRVO or BRVO treated with ranibizumab injection or dexamethasone implant who had 24 months of follow-up data

|                          | CRVO ( <i>n</i> = 612)                     |                                           |                 | BRVO ( <i>n</i> = 800)                     |                                           |                 |
|--------------------------|--------------------------------------------|-------------------------------------------|-----------------|--------------------------------------------|-------------------------------------------|-----------------|
|                          | Ranibizumab injection<br>( <i>n</i> = 539) | Dexamethasone implant<br>( <i>n</i> = 73) | <i>P</i> -value | Ranibizumab injection<br>( <i>n</i> = 713) | Dexamethasone implant<br>( <i>n</i> = 87) | <i>P</i> -value |
| <b>Number of visits</b>  |                                            |                                           |                 |                                            |                                           |                 |
| All ophthalmology visits | 11.0 (7.0)                                 | 9.3 (5.8)                                 | 0.115           | 10.5 (6.3)                                 | 9.0 (5.6)                                 | 0.038           |
| Treatment visits         | 5.6 (4.5)                                  | 2.3 (1.9)                                 | < 0.0001        | 5.0 (4.2)                                  | 2.2 (1.7)                                 | < 0.0001        |
| Non-treatment visits     | 5.3 (5.0)                                  | 7.0 (5.2)                                 | 0.006           | 5.5 (4.5)                                  | 6.8 (4.8)                                 | 0.030           |
| <b>Interval, days</b>    |                                            |                                           |                 |                                            |                                           |                 |
| All ophthalmology visits | 58.0 (46.5)                                | 62.3 (33.6)                               | 0.346           | 61.5 (41.8)                                | 70.5 (49.4)                               | 0.024           |
| Treatment visits         | 70.7 (58.4)                                | 174.2 (94.7)                              | < 0.0001        | 80.3 (78.8)                                | 181.8 (95.5)                              | < 0.0001        |
| Non-treatment visits     | 102.9 (82.9)                               | 85.1 (64.8)                               | 0.018           | 101.8 (71.0)                               | 82.6 (46.1)                               | 0.005           |

Data are shown as mean (SD).

BRVO, branch retinal vein occlusion; CRVO, central retinal vein occlusion; SD, standard deviation.
